# Supplementary material for: A tick C1q protein alters infectivity of the Lyme disease agent by modulating interferon γ
Source: PubMed Central journal article supplement — Cell Rep. Author manuscript; Available in PMC 2023 Feb 9. (PMC9909562; doi:10.1016/j.celrep.2022.111673), 2022-11-22
Supplement: NIHMS1860140-supplement-Supplementary_materials.pdf [file NIHMS1860140-supplement-Supplementary_materials.pdf]

**Cell Reports, Volume 41**

**Supplemental information**

**A tick C1q protein alters infectivity  
of the Lyme disease agent  
by modulating interferon  $\gamma$**

**Xiaotian Tang, Gunjan Arora, Jaqueline Matias, Thomas Hart, Yingjun Cui, and Erol Fikrig**

## Supplementary materials

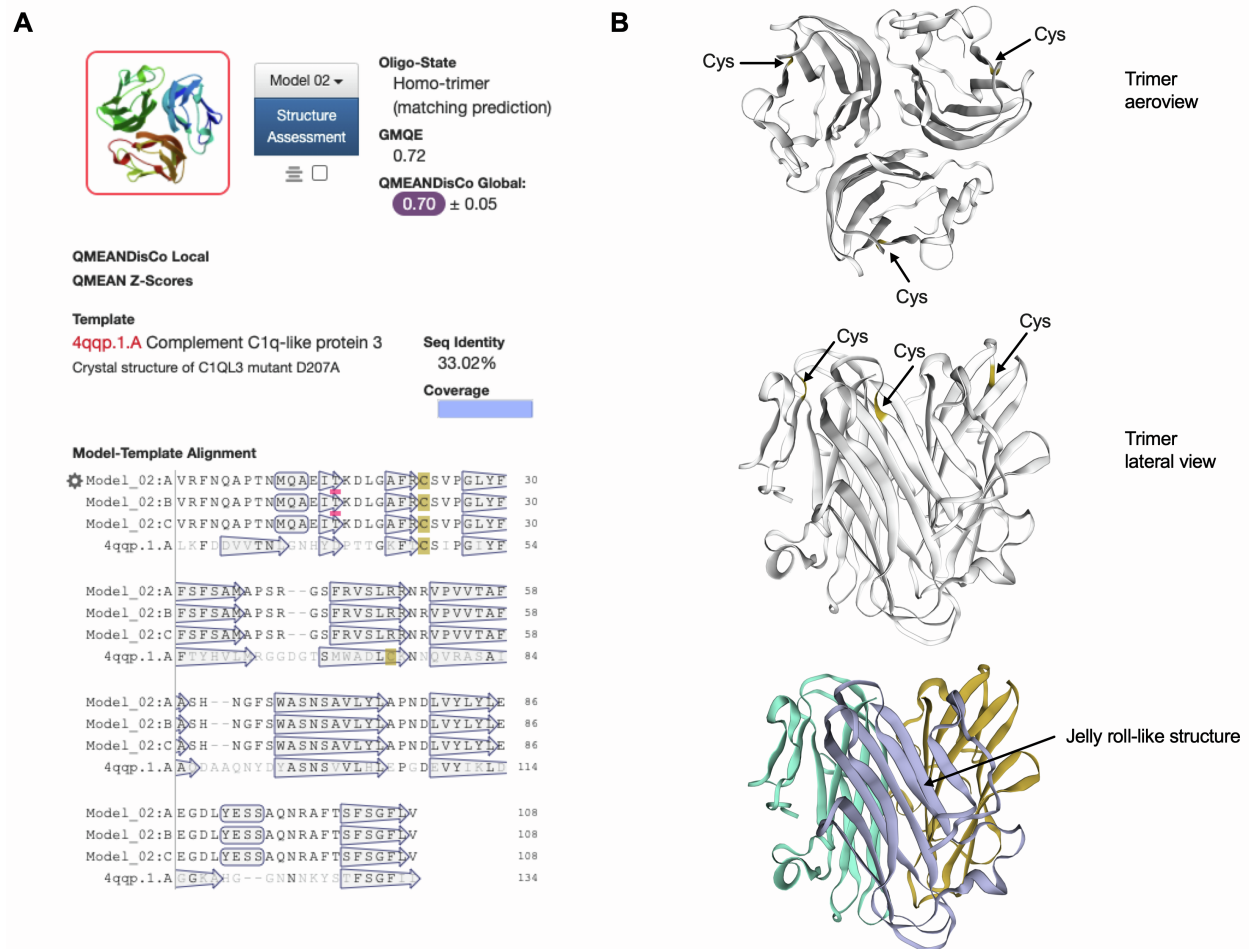

**Figure S1. IsC1q3 protein structure homology-modelling based on the platform of Swiss-Model.** (A) The predicted protein structure of IsC1q3 has a high degree of similarity to mammal complement C1q-like protein 3 with the global model quality estimation (GMQE) value of 0.72. (B) IsC1q3 is predicted to form a trimer and have a jelly roll-like structure. The cysteine (cys) residue is highlighted with yellow color.

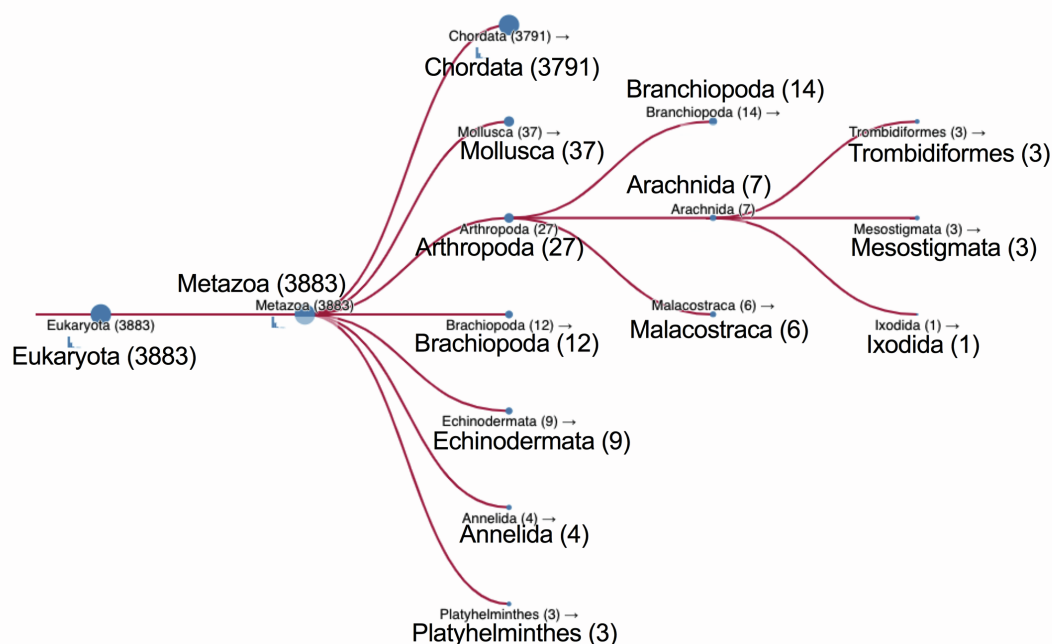**B**

|                          |                                                               |     |
|--------------------------|---------------------------------------------------------------|-----|
| Ixodes_scapularis        | -----                                                         | 0   |
| Ixodes_persulcatus       | -----                                                         | 0   |
| Dermacentor_silvarum     | -----                                                         | 0   |
| Rhipicephalus_sanguineus | -----                                                         | 0   |
| Rhipicephalus_microplus  | MAKAVLVLAFFVFIAYVAPQGATEEHQHESHEGHHGDHIDEHGRHPRPHGSCVNLSEQSLA | 60  |
|                          |                                                               |     |
| Ixodes_scapularis        | -----MQTWVVL-----                                             | 7   |
| Ixodes_persulcatus       | -----                                                         | 0   |
| Dermacentor_silvarum     | -----MCSIRDATAAAGWRLLP-VL                                     | 19  |
| Rhipicephalus_sanguineus | -----MGATSNATTFASRLLLPVLV                                     | 20  |
| Rhipicephalus_microplus  | AVVECVVRNVTEEIRGKLESVKESLRCDTILYRRTSGMDPTDARRAITFPGRLLLAVLL   | 120 |
|                          |                                                               |     |
| Ixodes_scapularis        | AVHFCCALCAEARIGFTMTQGSVDGTYVRFNQAPTNNQAEITKDLGAFRCSPGLYFFSF   | 67  |
| Ixodes_persulcatus       | -----MTQGSVDGTYVRFNQAPTNNQAEITKDLGAFRCSPGLYFFTF               | 43  |
| Dermacentor_silvarum     | LLGFFAVQEASAVVGMTMTQGTQDGTYIRFKRVPTNMLAEVTKELGAFRCSPGLYFFSF   | 79  |
| Rhipicephalus_sanguineus | VVGFFATQEASAMVGFTMTQATQDGTYIRFNRVLTNMIADITKELGAFRCSPGLYFFSF   | 80  |
| Rhipicephalus_microplus  | VFGLFATQEASAMVGFTMTQGTQDGTYIRFNRVPTNMIADVTKELGAFRCSPGLYFFSF   | 180 |
|                          | ***.: *****:*.:. ** *::*:***** ***:**                         |     |
|                          |                                                               |     |
| Ixodes_scapularis        | SAMAPSRGFSFRVSLRRNRVPVVTAFASHNQGSFASNSAVLYLAPNDLVLYLEEGDLYES  | 127 |
| Ixodes_persulcatus       | SAMAPSRGFSFRVSLRRNRVPVVTAFASHNQGSFASNSVVLVYLPNDLVLYLEEGDIYES  | 103 |
| Dermacentor_silvarum     | TAMAPSPGSCRISLRRNRVPVVTAFASNSGFSWISSGALLYLQNDLVLYLEDGTIHES    | 139 |
| Rhipicephalus_sanguineus | TAMAPSQGSCRISLRRNRIPMVTAFASNNQGSFASNSGAVLYLSQGDVVYLYLEDGAIHES | 140 |
| Rhipicephalus_microplus  | TAMAPSQGSCRISLRKNRVPIVTAFAASNSGFSWISSGAVLYLSQGDVVYPYVEDGAIHES | 240 |
|                          | :***** ** *:***:***:*****:***** *...***: .*** ***: ***:**     |     |
|                          |                                                               |     |
| Ixodes_scapularis        | SAQNRAFTSFSGFLVGDESHLLGRN-P---VEEEMGAPDPADEIFQKLALIRRKGTV-    | 181 |
| Ixodes_persulcatus       | SAQNRAFTSFSGFLVGDESHLLGRN-P---VEEEMGAPDPTDDIFQKLAIIRKGTV-     | 157 |
| Dermacentor_silvarum     | SATNRAFTSFSGFAVGTDL--MGRT-PDTDAIEGPLSPDPDFDDIAERMYRVKLSKNAT   | 196 |
| Rhipicephalus_sanguineus | SVPNRAFTSFSGFTVSTDLS--MARNGPVVDVTEGPLSPDPDYDDIEERMYRVKLAKNAT  | 198 |
| Rhipicephalus_microplus  | SAPNRAFTSFSGFTVSTDLS--MARNGPVVDVTEGPLTSPDPDYDDIEERMYRVELAKNAT | 298 |
|                          | *, *****:* * .: :*. * * : :*** ***: :. .                      |     |
|                          |                                                               |     |
| Ixodes_scapularis        | ----- 181                                                     |     |
| Ixodes_persulcatus       | ----- 157                                                     |     |
| Dermacentor_silvarum     | AGTSASL 203                                                   |     |
| Rhipicephalus_sanguineus | TAASHS- 204                                                   |     |
| Rhipicephalus_microplus  | KSA---- 301                                                   |     |

**Figure S2. Characterization of *Ixodes scapularis* IsC1ql3.** (A) InterProScan search of IsC1ql3 homologs. (B) Protein sequence comparison of IsC1ql3 and homologs in ticks. gC1q domain regions are marked by upper lines. (\*) indicates positions which have a single, fully conserved residue (dark grey). (:) indicates conservation between groups of strongly similar properties (light grey). (.) indicates conservation between groups of weakly similar properties (white grey).

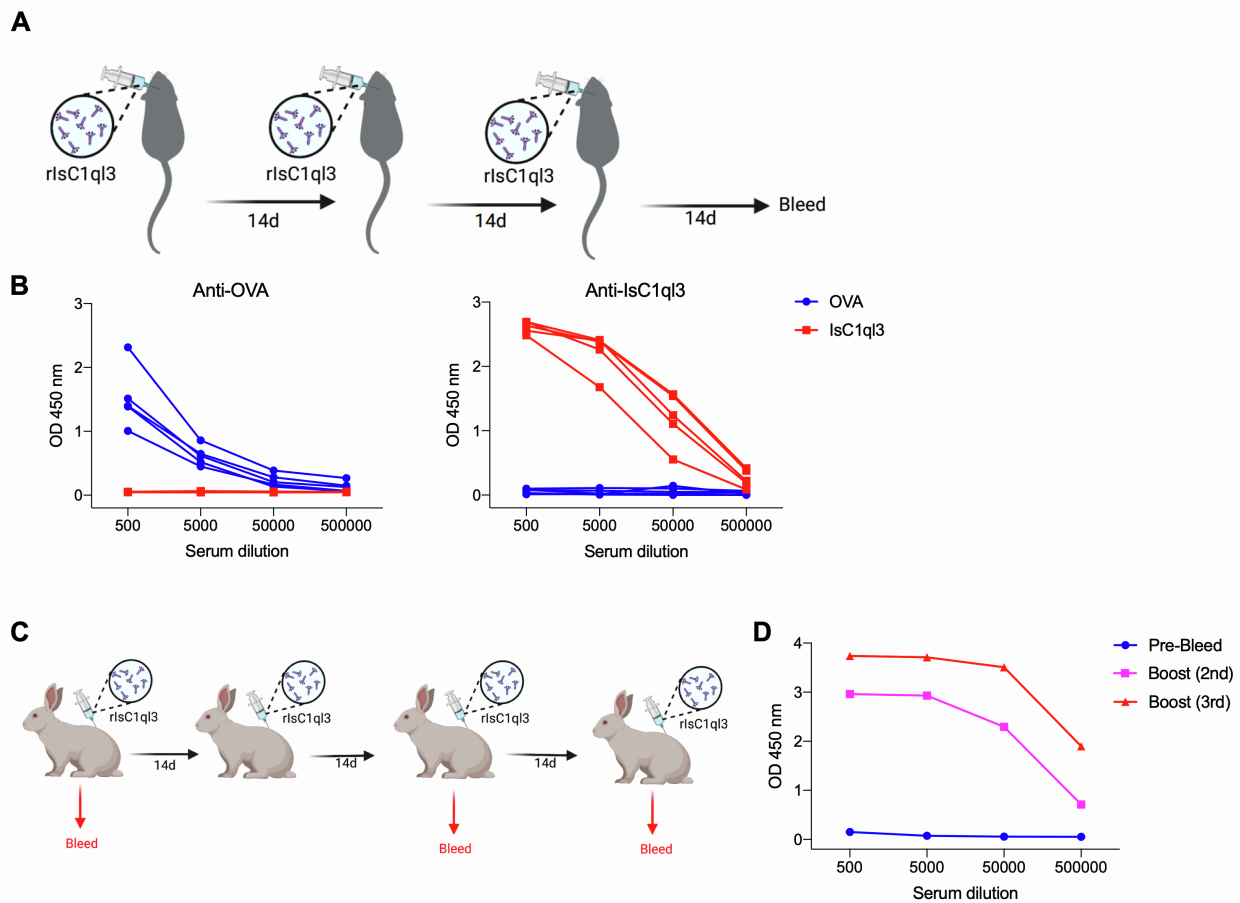

**Figure S3. Active immunization and antibody preparation of IsC1qI3.** (A) Mice were Immunized by injecting 10  $\mu$ g of rIsC1qI3 protein or ovalbumin (control) three times at 2-week intervals. Two weeks after the final immunization with IsC1qI3 or OVA, the sera from the immunized mice were examined for specific antibodies by ELISA. (B) Sera from IsC1qI3-immunized mice recognized IsC1qI3 (right panel), but not ovalbumin, OVA (left panel). (C) Rabbit anti-IsC1qI3 antibody preparation. A rabbit was immunized by injecting 150  $\mu$ g of rIsC1qI3 protein three times at 2-week intervals. Two weeks after the final immunization with IsC1qI3, the serum from the immunized rabbit was examined for specific antibodies with ELISA. (D) Sera from IsC1qI3-immunized mice recognized IsC1qI3.

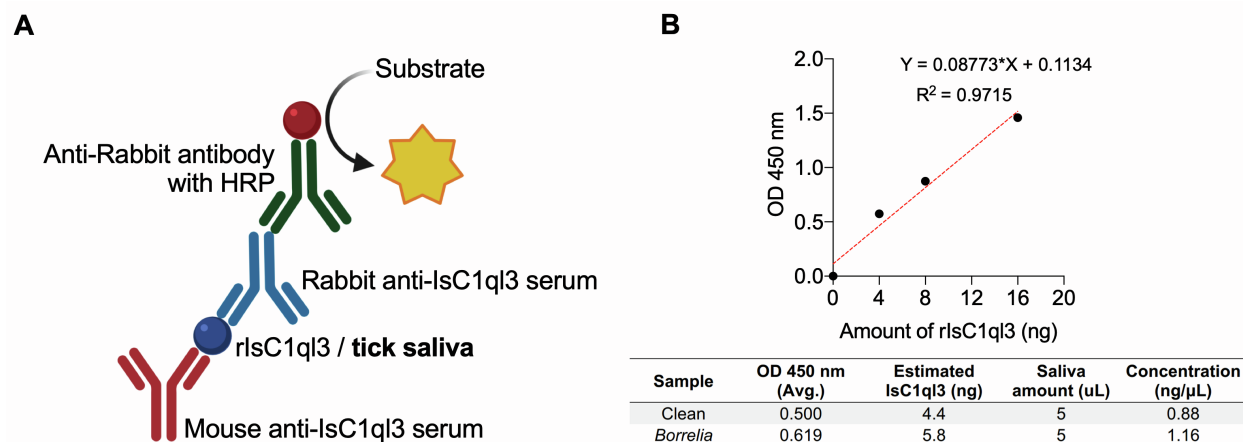

**Figure S4. Quantification of the IsC1ql3 concentration in tick saliva by capture ELISA.** (A) Schematic diagram of the capture ELISA to quantify the IsC1ql3 concentration in tick saliva. (B) Standard curve comparing the OD value of diluted samples for known amounts of recombinant IsC1ql3 and the OD value corresponding to IsC1ql3 in saliva from *B. burgdorferi*-uninfected and infected ticks.

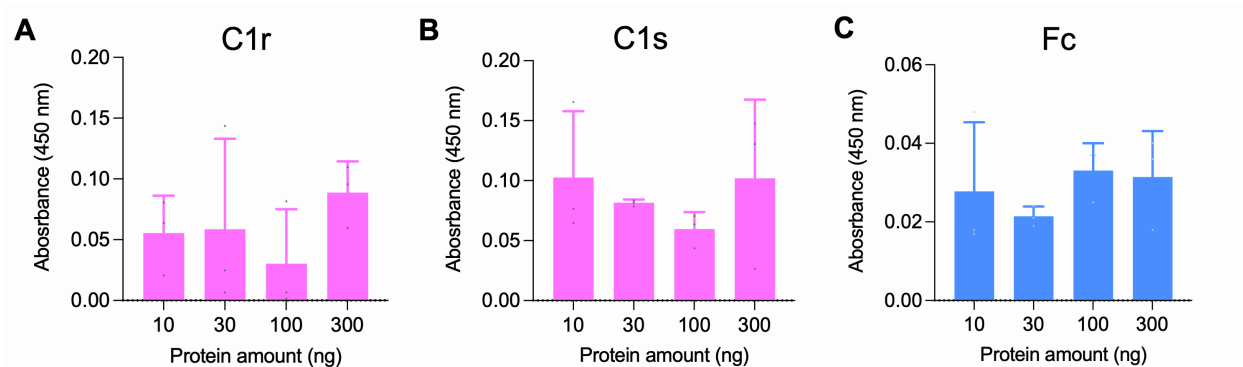

**Figure S5. IsC1ql3 is not involved in classical complement pathway cascade.** (A) ELISA result shows no interactions between IsC1ql3 and human C1r. Data are represented as mean  $\pm$  SD. (B) ELISA result shows no interactions between IsC1ql3 and human C1s. Data are represented as mean  $\pm$  SD. (C) ELISA result shows no interactions between IsC1ql3 and antibody Fc region. Data are represented as mean  $\pm$  SD.

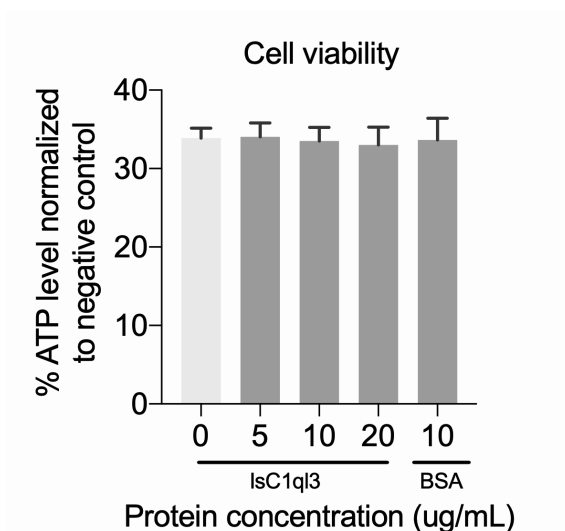

**Figure S6. No effect of rIsC1ql3 on splenocytes viability as determined by CellTiter-Glo luminescent cell viability assay.** Data are represented as mean  $\pm$  SD.

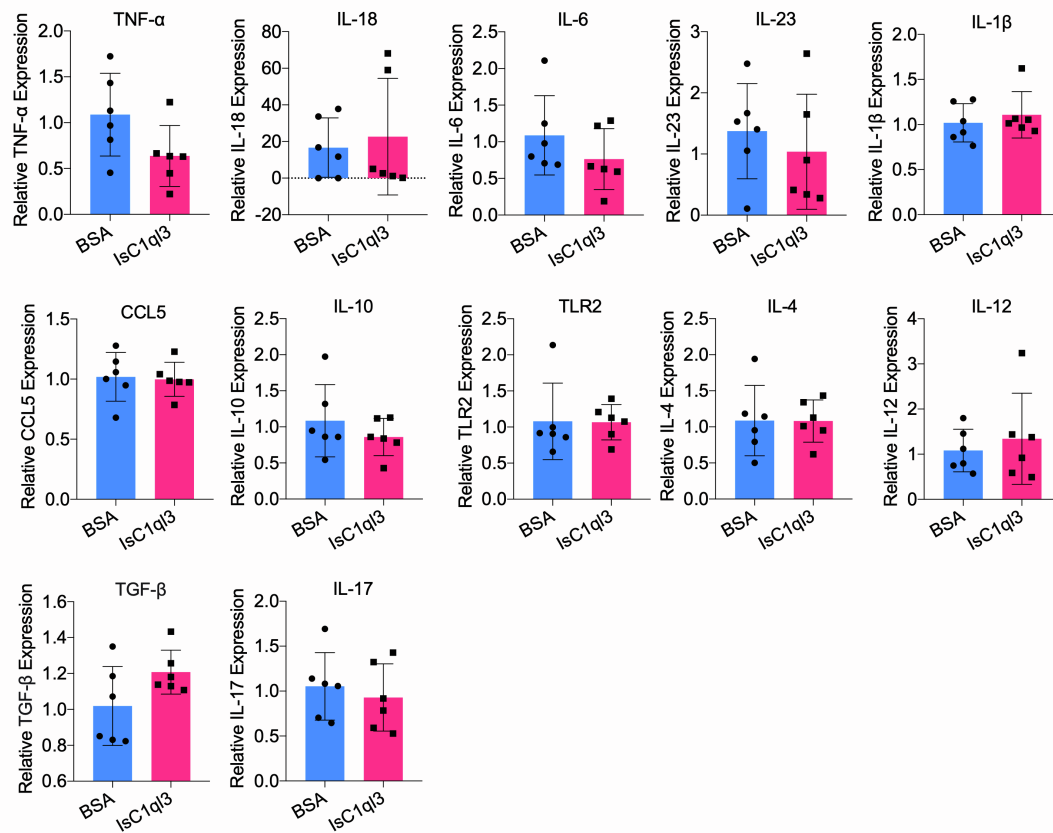

**Figure S7. The effects of IsC1ql3 on gene expression of cytokines and chemokines in splenocytes upon LPS stimulation. Data are represented as mean ± SD.**

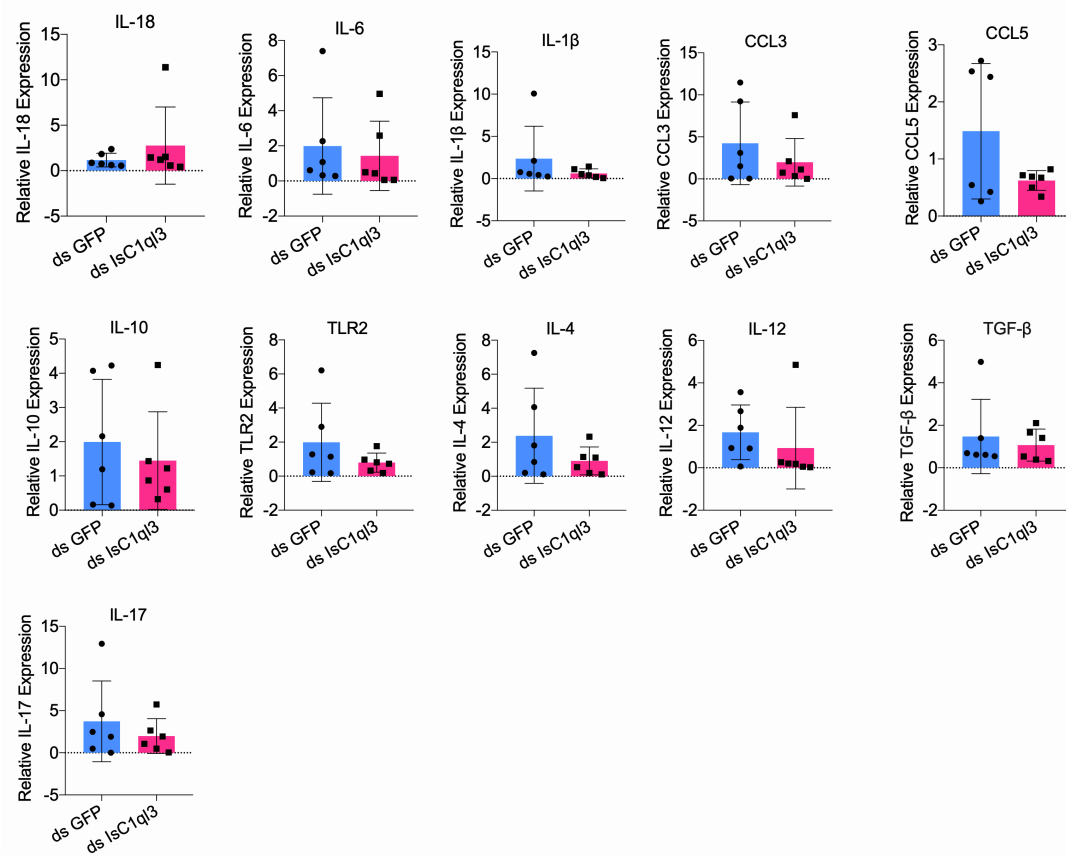

**Figure S8. Gene expression of cytokines and chemokines at the tick bite of mice after challenged by control (GFP) or *IsC1q/3*-silenced *B. burgdorferi*-infected ticks.** Data are represented as mean  $\pm$  SD.

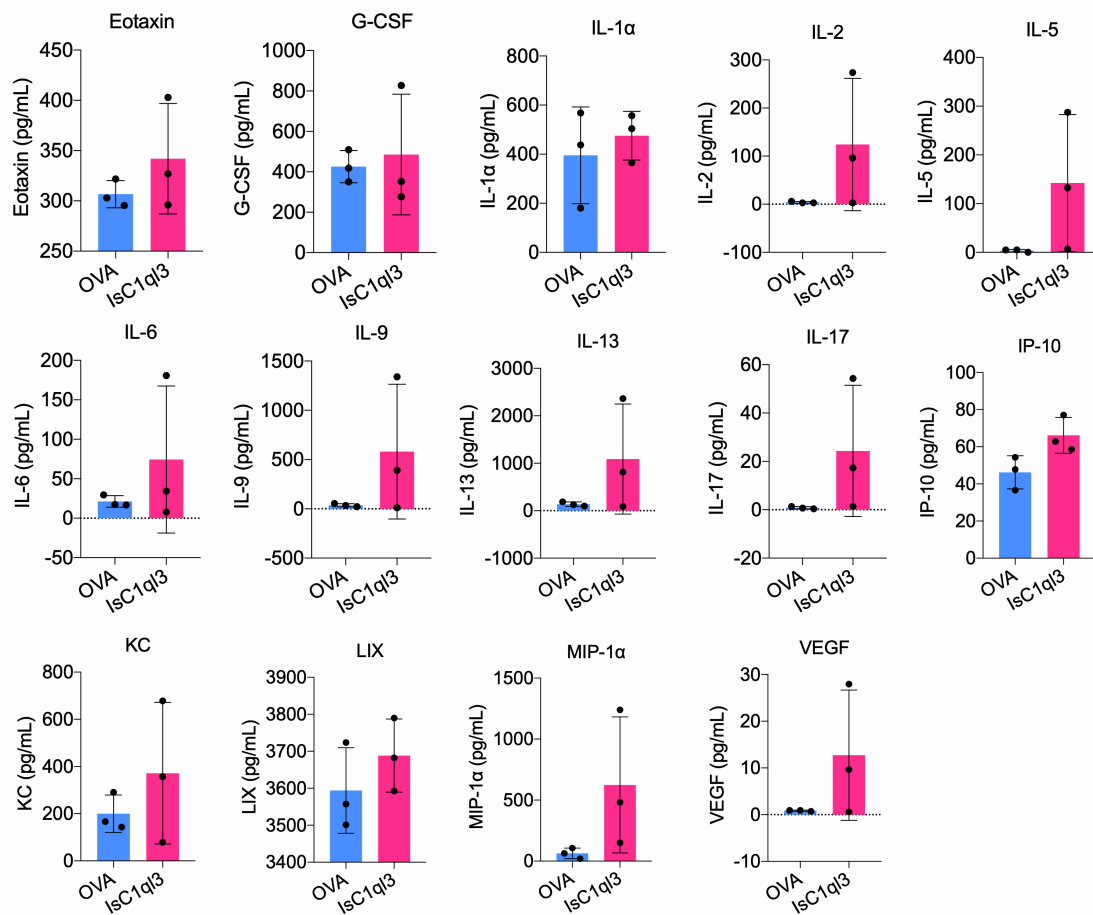

**Figure S9. Serum cytokines and chemokines production in control or IsC1q3-immunized mice after challenged by *B. burgdorferi*-infected ticks.** Data are represented as mean  $\pm$  SD.

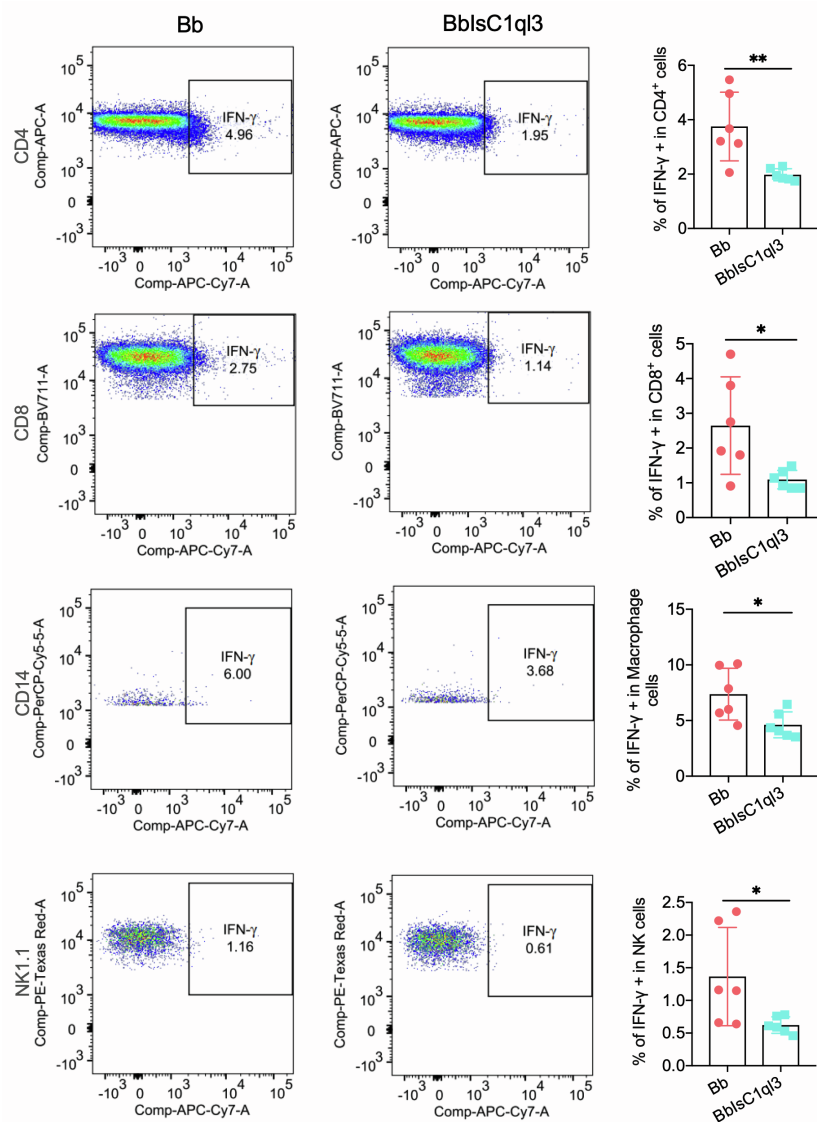

**Figure S10. Tick salivary protein IsC1qI3 attenuates the host immune response.** Percentage of CD4<sup>+</sup>, CD8<sup>+</sup> T cells, macrophages and NK cells expressing IFN-γ. IsC1qI3 significantly inhibits IFN-γ production in the immune cells upon *B. burgdorferi* infection and IL-12 stimulation. Data are represented as mean ± SD. Statistical significance was assessed using a non-parametric Mann-Whitney test (\*,  $p < 0.05$ ; \*\*,  $p < 0.01$ ).

**Table S1. Summary of differently expressed genes of transcriptome data from splenocytes that were stimulated by *B. burgdorferi*, with or without IsC1q13.**

| Gene ID     | Gene name                                                                 | p-value | Fold change |
|-------------|---------------------------------------------------------------------------|---------|-------------|
| Serpina3f   | serine (or cysteine) peptidase inhibitor, clade A, member 3F              | 0.0000  | -4.6483     |
| Iigp1       | Interferon- $\gamma$ -inducible 47-kDa GTPase                             | 0.0000  | -3.3747     |
| Tifab       | TRAF-interacting protein with forkhead-associated domain, family member B | 0.0002  | -3.3408     |
| Gm10291     | predicted pseudogene 10291                                                | 0.0013  | -3.1083     |
| Cxcl9       | chemokine (C-X-C motif) ligand 9                                          | 0.0000  | -3.0660     |
| Gbp2        | guanylate binding protein 2                                               | 0.0000  | -3.0367     |
| Gbp11       | guanylate binding protein 11                                              | 0.0000  | -2.8262     |
| Gbp10       | guanylate-binding protein 10                                              | 0.0000  | -2.8140     |
| Xcl1        | chemokine (C motif) ligand 1                                              | 0.0000  | -2.6498     |
| Itgad       | integrin, alpha D                                                         | 0.0018  | -2.6153     |
| Srgap3      | SLIT-ROBO Rho GTPase activating protein 3                                 | 0.0023  | -2.5747     |
| Serpina3g   | serine (or cysteine) peptidase inhibitor, clade A, member 3G              | 0.0000  | -2.5561     |
| Gm12185     | predicted gene 12185                                                      | 0.0000  | -2.5301     |
| Ffar2       | free fatty acid receptor 2                                                | 0.0052  | -2.5140     |
| Gm43302     | predicted gene 43302                                                      | 0.0000  | -2.4890     |
| Ankrd61     | ankyrin repeat domain 61                                                  | 0.0025  | -2.3738     |
| Tgtp1       | T cell specific GTPase 1                                                  | 0.0000  | -2.3571     |
| Gm49730     | predicted gene 49730                                                      | 0.0080  | -2.3461     |
| Rps2-ps5    | ribosomal protein S2, pseudogene 5                                        | 0.0000  | -2.3354     |
| Gm18852     | predicted gene 18852                                                      | 0.0002  | -2.3254     |
| Gm18180     | predicted gene, 18180                                                     | 0.0012  | -2.3104     |
| Dnaaf3      | dynein, axonemal assembly factor 3                                        | 0.0111  | -2.2805     |
| Gbp8        | guanylate-binding protein 8                                               | 0.0000  | -2.2804     |
| Igf2bp2     | insulin-like growth factor 2 mRNA binding protein 2                       | 0.0082  | -2.2498     |
| Rnd3        | Rho family GTPase 3                                                       | 0.0031  | -2.2069     |
| Eaf2        | ELL associated factor 2                                                   | 0.0109  | -2.1957     |
| Gm2654      | predicted gene 2654                                                       | 0.0162  | -2.1707     |
| Rpl23a-ps14 | Ribosomal Protein L23a                                                    | 0.0086  | -2.1634     |
| Gbp4        | guanylate binding protein 4                                               | 0.0000  | -2.1628     |
| Gm15801     | predicted gene 15801                                                      | 0.0314  | -2.1592     |
| Gm28177     | predicted gene 28177                                                      | 0.0002  | -2.1587     |

|               |                                                                                   |        |         |
|---------------|-----------------------------------------------------------------------------------|--------|---------|
| Gm28539       | predicted gene 28539                                                              | 0.0068 | -2.1554 |
| Gm5630        | predicted pseudogene 5630                                                         | 0.0056 | -2.1479 |
| Gm11739       | predicted gene 11739                                                              | 0.0135 | -2.1358 |
| Gm6257        | predicted gene 6257                                                               | 0.0128 | -2.1231 |
| Gbp6          | guanylate binding protein 6                                                       | 0.0000 | -2.0585 |
| Gbp7          | guanylate binding protein 7                                                       | 0.0000 | -2.0339 |
| AA413626      | expressed sequence AA413626                                                       | 0.0100 | -2.0292 |
| Tstd1         | thiosulfate sulfurtransferase<br>(rhodanese)-like domain containing 1             | 0.0129 | -2.0211 |
| Gm16069       | predicted gene 16069                                                              | 0.0259 | -2.0193 |
| Gm20302       | predicted gene, 20302                                                             | 0.0199 | -2.0065 |
| Gm5561        | predicted gene 5561                                                               | 0.0031 | -2.0051 |
| Gm8979        | predicted gene 8979                                                               | 0.0000 | -2.0029 |
| Cd163l1       | CD163 Molecule Like 1                                                             | 0.0160 | 2.0161  |
| Amot          | angiomin                                                                          | 0.0157 | 2.0296  |
| 4930594C11Rik | RIKEN cDNA 4930594C11 gene                                                        | 0.0124 | 2.0301  |
| Tmem220       | transmembrane protein 220                                                         | 0.0117 | 2.0317  |
| Slpi          | secretory leukocyte peptidase inhibitor                                           | 0.0000 | 2.0435  |
| Tarm1         | T cell-interacting, activating receptor on<br>myeloid cells 1                     | 0.0008 | 2.0664  |
| Ptgr1         | prostaglandin reductase 1                                                         | 0.0244 | 2.0736  |
| Tnfsf15       | tumor necrosis factor (ligand)<br>superfamily, member 15                          | 0.0050 | 2.0855  |
| Gm17173       | predicted gene 17173                                                              | 0.0092 | 2.1432  |
| Trav14n-1     | T cell receptor alpha variable 14N-1                                              | 0.0411 | 2.1527  |
| Lrrc6         | leucine rich repeat containing 6                                                  | 0.0122 | 2.1808  |
| Gm10074       | predicted gene 10074                                                              | 0.0038 | 2.1857  |
| Gm10416       | predicted pseudogene 10416                                                        | 0.0200 | 2.2002  |
| Gm6361        | predicted gene 6361                                                               | 0.0088 | 2.4020  |
| Rufy4         | RUN and FYVE domain containing 4                                                  | 0.0271 | 2.4905  |
| Mmp13         | matrix metalloproteinase 13                                                       | 0.0052 | 2.5401  |
| Zfp708        | zinc finger protein 708                                                           | 0.0073 | 2.5899  |
| Ptges         | prostaglandin E synthase                                                          | 0.0000 | 2.6199  |
| Slc7a2        | solute carrier family 7 (cationic amino<br>acid transporter, y+ system), member 2 | 0.0008 | 2.6946  |
| Pcdhgb7       | protocadherin gamma subfamily B, 7                                                | 0.0010 | 2.8856  |

“-” indicates downregulation of genes in the spirochetes with IsC1ql3 after *B. burgdorferi* stimulation.

**Table S2. The primers used in this study.**

| Gene name              | Primer sequence                                                                                                     |
|------------------------|---------------------------------------------------------------------------------------------------------------------|
| Tick <i>actin</i>      | F: GGCGACGTAGCAG<br>R: GGTATCGTGCTCGACTC                                                                            |
| Mouse <i>β-actin</i>   | F: AGCGGGAAATCGTGCGTG<br>R: CAGGGTACATGGTGGTGCC                                                                     |
| <i>Borrelia flaB</i>   | F: TTCAATCAGGTAACGGCACA<br>R: GACGCRRGAGACCCTGAAAG                                                                  |
| ds <i>GFP</i>          | F:<br>TAATACGACTCACTATAGGGAGAGCGACGTAAACGGCCACAAG<br>TT<br>R:<br>TAATACGACTCACTATAGGGAGACGGGTCTTGTAGTTGCCGTC        |
| ds <i>IsC1qI3</i>      | F:<br>TAATACGACTCACTATAGGGAGAGAACATGCAGGCAGAAATCA<br>R:<br>TAATACGACTCACTATAGGGAGAACGAGAAAGCCCGAGAAAG               |
| <i>IsC1qI3</i> qPCR    | F: ACGAGAGCCATCACCTCCT<br>R: TCCCCTTTCTGCGAATAAGA                                                                   |
| <i>IsC1qI3_pMT</i>     | F: CTCGCTCGGGAGATCTATGCAGACCTGGGTTGTTCTTG<br>R: GCCCTCTAGACTCGAGTACCGTCCCCTTTCTGCGAAT                               |
| <i>IsC1qI3_pET-28a</i> | F:<br>CTGGTGCCGCGCGGCAGCCATATGGTGCGCTTCAACCAGGCG<br>CCGA<br>R:<br>GTGCTCGAGTGCGGCCGCAAGCTTCACGAGAAAGCCCGAGAA<br>AGA |
| TNF-α qPCR             | F: AGGCACTCCCCCAAAGATG<br>R: TGGTGGTTTGTGAGTGTGAGG                                                                  |
| IL-18 qPCR             | F: GACTCTTGCGTCAACTTCAAGG<br>R: CAGGCTGTCTTTTGTCAACGA                                                               |
| IL-6 qPCR              | F: ATACCACTCCCAACAGACCT<br>R: CCAGTTTGGTAGCATCCATC                                                                  |
| IL-1β qPCR             | F: GCAGTGGTTCGAGGCCTAAT<br>R: GCTGCTTCAGACACTTGAC                                                                   |
| CCL3 qPCR              | F: GCCAGGTGTCATTTTCCTGAC<br>R: CTCAAGCCCCTGCTCTACAC                                                                 |
| IFN-γ qPCR             | F: GAGGAACTGGCAAAAGGATGG<br>R: ACCTGTGGGTTGTTGACCTC                                                                 |
| CCL5 qPCR              |                                                                                                                     |

|                   |                                                                            |
|-------------------|----------------------------------------------------------------------------|
|                   | F: GACAGCACATGCATCTCCCA<br>R: GTGTCCGAGCCATATGGTGA                         |
| IL-10 qPCR        | F: GTACAGCCGGGAAGACAATAAC<br>R: GCATTAAGGAGTCGGTTAGCAG                     |
| TLR2 qPCR         | F: AAGAGGAAGCCCAAGAAAGC<br>R: AATGGGAATCCTGCTCACTG                         |
| IL-4 qPCR         | F: CGGATGCGACAAAAATCAC<br>R: CGTTTGGCACATCCATCTC                           |
| IL-12 qPCR        | F: ATCGTTTTGCTGGTGTCTCC<br>R: CTTCTTCAGGCGTGTACAG                          |
| TGF- $\beta$ qPCR | F: TGGAGCAACATGTGGA <sup>CTC</sup><br>R: TGCCGTACA <sup>ACT</sup> CCAGTGAC |
| IL-17 qPCR        | F: TCATCTGTGTCTCTGATGCTGTTG<br>R: TCGCTGCCTTCACTGT                         |
| Dae2 qPCR         | F: CATCGAGGGCTCAAGTTTT <sup>C</sup><br>R: CGTGGTGTAGTCCCTCAGGT             |
| gC1qR qPCR        | F: CATTTGATGGTGAGGAGGAG<br>R: AAAGTTGGGAGTTGATGTCC                         |

The underlines indicate restriction enzymes sites. The italicized letters indicate T7 promoter sequence.
